# Supplementary material for: Multiplex genome engineering in human cells using all-in-one CRISPR/Cas9 vector system
Source: PubMed Central journal article supplement — Sci Rep. 2014 Jun 23;4:5400. doi: 10.1038/srep05400 (PMC4066266; doi:10.1038/srep05400), 2014-06-23
Supplement: srep05400-s1.pdf [file srep05400-s1.pdf]

# **Supplementary information**

## **Multiplex genome engineering in human cells using all-in-one CRISPR/Cas9 vector system**

**Tetsushi Sakuma\*, Ayami Nishikawa, Satoshi Kume, Kazuaki Chayama, Takashi Yamamoto\***

\*Correspondence and requests for materials should be addressed to T.S. and T.Y.

E-mail: T.S., [tetsushi-sakuma@hiroshima-u.ac.jp](mailto:tetsushi-sakuma@hiroshima-u.ac.jp)

T.Y., [tybig@hiroshima-u.ac.jp](mailto:tybig@hiroshima-u.ac.jp)

### **Contents:**

**Supplementary Figure S1**

**Supplementary Figure S2**

**Supplementary Table S1**

**Supplementary Table S2**

**Supplementary Table S3**

**Supplementary Table S4**

A

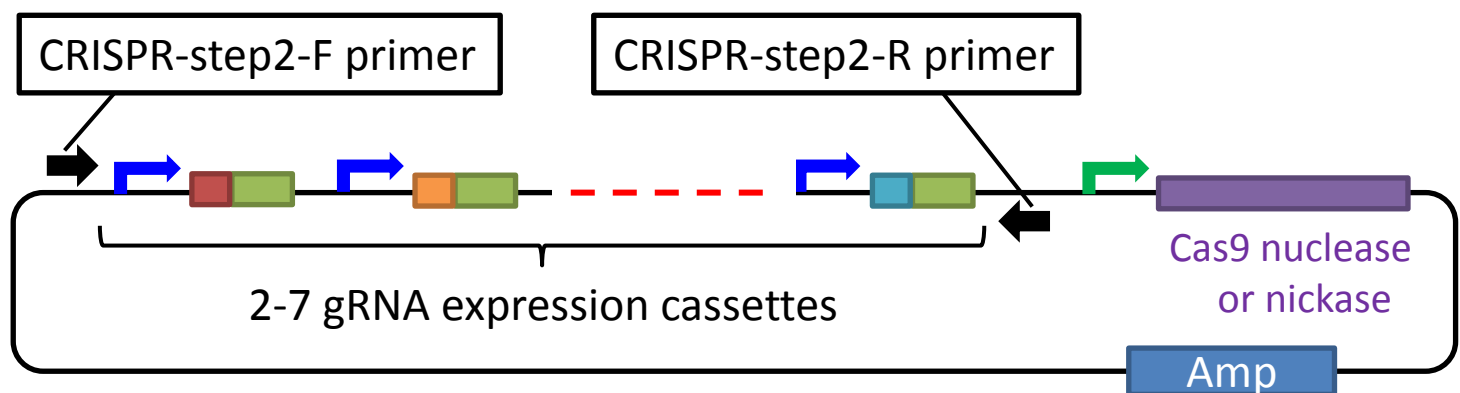

B

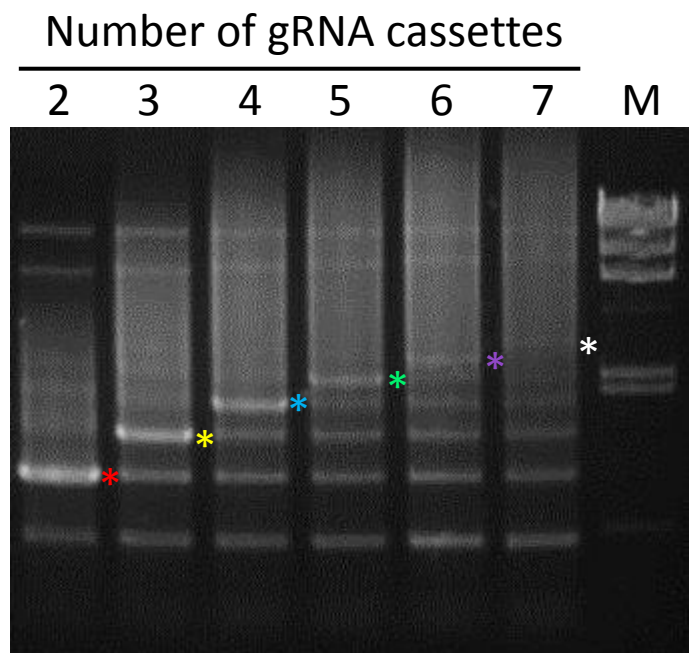

**Supplementary Figure S1. PCR screening of gRNA cassette-assembled clones.** (A) Schematic illustration of PCR screening. CRISPR-step2-F and CRISPR-step2-R primers were used for amplification. (B) Gel image of PCR screening. In this figure, plasmid DNAs were used as templates. Red, yellow, blue, green, purple and white asterisks indicate expected sizes of amplicons from 2-, 3-, 4-, 5-, 6- and 7-gRNA-assembled clones, respectively. M,  $\lambda$ HindIII marker.

**A**

**HPRT1\_A** 5' - TTATGCTGAGGATTTGGAAAGGG - 3'  
3' - AATACGACTCCTAAACCTTTCCC - 5'

**HPRT1\_B** 5' - CCTATGACTGTAGATTTTATCAG - 3'  
3' - GGATACTGACATCTAAAATAGTC - 5'

**ATM** 5' - TGAATTGGGATGCTGTTTTTAGG - 3'  
3' - ACTTAACCCTACGACAAAATCC - 5'

**APC** 5' - CCGGTCGCCCCTTTGCCCGCTTC - 3'  
3' - GGCCAGCGGGGAAACGGGCGAAG - 5'

**CDH1** 5' - TGACTTGCGAGGGACGCATTTCGG - 3'  
3' - ACTGAACGCTCCCTGCGTAAGCC - 5'

**AXIN2** 5' - TATGTTGGTGACTTGCCTCCCGG - 3'  
3' - ATACAACCACTGAACGGAGGGCC - 5'

**CFTR** 5' - CCTATGATGAATATAGATACAGA - 3'  
3' - GGATACTACTTATATCTATGTCT - 5'

**B**

**off-5** 5' - CCAGCCTGAGTGCTCTGAGCCTCGATGA GCCATTTATACAGAAAGATGTGG - 3' (off-5\_R)  
3' - GGTCGGACTCACGAGACTCGGAGCTACTCGGTAAATATGTCTTTCTACACC - 5' (off-5\_L)  
5 bp offset

**off-8** 5' - CCAACAATCAGCTAATAAGACACAAGCTATT GCAAAGCAGCCAATAAATCGAGG - 3' (off-8\_R)  
3' - GGTTGTTAGTCGATTATTCTGTGTTTCGATAACGTTTCGTCCGGTTATTTAGCTCC - 5' (off-8\_L)  
8 bp offset

**off-4** 5' - CCATTAAGTAGACCTATACAGTCTCCT GGCCGAAACTCAATTTCCCCTGG - 3' (off-4\_R)  
3' - GGTAATTCATCTGGATATGTCAGAGGACCGGCTTTGAGTTAAAGGGGACC - 5' (off-4\_L)  
4 bp offset

**Supplementary Figure S2. Schematic design of CRISPR/Cas9 target sequences used in this study.** (A) Design of CRISPR/Cas9 nucleases, related to Fig. 2. Red letters indicate target sequences including PAMs. PAM sequences are underlined. (B) Design of CRISPR/Cas9 nickases, related to Fig. 3. Red letters indicate target sequences including PAMs. PAM sequences are underlined. Blue lines and letters indicate offsets between two gRNA target sequences.

**Supplementary Table S1. Summary of plasmid construction for establishing all-in-one vector system.**

| Plasmid name | Vector                                           |                                                     |                                           | Insert    |                                                             |                                                       |
|--------------|--------------------------------------------------|-----------------------------------------------------|-------------------------------------------|-----------|-------------------------------------------------------------|-------------------------------------------------------|
|              | Template                                         | Forward primer (5'->3')                             | Reverse primer (5'->3')                   | Template  | Forward primer (5'->3')                                     | Reverse primer (5'->3')                               |
| pX330S       | pX330                                            | AAGCATTG<br>GTAAGTGT<br>CAGACCAA<br>GTTTACTC        | AAGTGCCA<br>CCTGACGT<br>CTAAGAAA<br>CC    | pFUS_A30A | CGTCAGGTGGCACTTCC<br>AGCCAGGACAGAAATG<br>CCTC               | CAGTTACCAATGCTTTT<br>ATTTGCCGACTACCTTG<br>GTGATCTC    |
| pX330S-2     | pX330S                                           | TGAGACCC<br>GTTACATA<br>ACTTACGG<br>TAAATGGC<br>CCG | TGAGACCT<br>GAGCAAA<br>AGGCCAGC<br>AAAAGG | pX330     | TTTGCTCAGGTCTCACT<br>CTAGAGGCATGTGAGG<br>GCCTATTTCCCATGATTC | ATGTAACGGGTCTCATA<br>GAGCCATTTGTCTGCAG<br>AATTGGCG    |
| pX330S-3     |                                                  |                                                     |                                           |           | TTTGCTCAGGTCTCATC<br>TAGAGGCATGTGAGGG<br>CCTATTTCCCATGATTC  | ATGTAACGGGTCTCACT<br>AGAGCCATTTGTCTGCA<br>GAATTGGCG   |
| pX330S-4     |                                                  |                                                     |                                           |           | TTTGCTCAGGTCTCACT<br>AGAGGCATGTGAGGGC<br>CTATTTCCCATGATTC   | ATGTAACGGGTCTCATC<br>TAGAGCCATTTGTCTGC<br>AGAATTGGC   |
| pX330S-5     |                                                  |                                                     |                                           |           | TTTGCTCAGGTCTCATA<br>GAGGCATGTGAGGGCC<br>TATTTCCCATGATTC    | ATGTAACGGGTCTCACT<br>CTAGAGCCATTTGTCTG<br>CAGAATTGGC  |
| pX330S-6     |                                                  |                                                     |                                           |           | TTTGCTCAGGTCTCAAG<br>AGGCATGTGAGGGCCTA<br>TTTCCCATGATTC     | ATGTAACGGGTCTCACC<br>TCTAGAGCCATTTGTCT<br>GCAGAATTGG  |
| pX330S-7     |                                                  |                                                     |                                           |           | TTTGCTCAGGTCTCAGA<br>GGCATGTGAGGGCCTAT<br>TTCCCATGATTC      | ATGTAACGGGTCTCAAC<br>CTCTAGAGCCATTTGTC<br>TGCAGAATTGG |
| pX330A-1x2   |                                                  |                                                     |                                           |           | pX330                                                       | AGGTACCC<br>GTTACATA<br>ACTTACGG<br>TAAATGGC          |
| pX330A-1x3   | ATGTAACGGGTACCTCT<br>AGAGAGACCACCGGTG<br>GAAAGCG |                                                     |                                           |           |                                                             |                                                       |
| pX330A-1x4   | ATGTAACGGGTACCTCT<br>AAGAGACCACCGGTGG<br>AAAGCG  |                                                     |                                           |           |                                                             |                                                       |
| pX330A-1x5   | ATGTAACGGGTACCTCT<br>AGAGACCACCGGTGGA<br>AAGCG   |                                                     |                                           |           |                                                             |                                                       |
| pX330A-1x6   | ATGTAACGGGTACCTCA<br>GAGACCACCGGTGGAA<br>AGCG    |                                                     |                                           |           |                                                             |                                                       |
| pX330A-1x7   | ATGTAACGGGTACCTAG<br>AGACCACCGGTGGAAA<br>GCG     |                                                     |                                           |           |                                                             |                                                       |

## Supplementary Table S2. Oligonucleotides and vectors for the insertion of gRNA target sequences.

| Target locus   | Vector          | Sense oligonucleotide (5'→3') | Antisense oligonucleotide (5'→3') |
|----------------|-----------------|-------------------------------|-----------------------------------|
| <i>HPRT1_A</i> | pX330A-1x7      | CACCGTTATGCTGAGGATTTGGAAA     | AAACTTTCCAAATCCTCAGCATAAC         |
| <i>HPRT1_B</i> | pX330S-2        | CACCGCTGATAAAATCTACAGTCAT     | AAACATGACTGTAGATTTTATCAGC         |
| <i>ATM</i>     | pX330S-3        | CACCGTGAATTGGGATGCTGTTTTT     | AAACAAAACAGCATCCCAATTCAC          |
| <i>APC</i>     | pX330S-4        | CACCGAAGCGGGCAAAGGGGCGAC      | AAACGTCGCCCTTTGCCCCGCTTC          |
| <i>CDH1</i>    | pX330S-5        | CACCGTGACTTGCAGGGACGCATT      | AAACAATGCGTCCCTCGCAAGTCAC         |
| <i>AXIN2</i>   | pX330S-6        | CACCGTATGTTGGTGACTTGCCTCC     | AAACGGAGGCAAGTCACCAACATAC         |
| <i>CFTR</i>    | pX330S-7        | CACCGTCTGTATCTATATTCATCAT     | AAACATGATGAATATAGATACAGAC         |
| off-5_L        | pX330A_D10A-1x6 | CACCGAGGCTCAGAGCACTCAGGC      | AAACGCCTGAGTGCTCTGAGCCTC          |
| off-5_R        | pX330S-2        | CACCGCCATTTATACAGAAAGATG      | AAACCATCTTTCTGTATAAATGGC          |
| off-8_L        | pX330S-3        | CACCGTGTCTTATTAGCTGATTGT      | AAACACAATCAGCTAATAAGACAC          |
| off-8_R        | pX330S-4        | CACCGCAAAGCAGCCAATAAATCG      | AAACCGATTTATTGGCTGCTTTGC          |
| off-4_L        | pX330S-5        | CACCGACTGTATAGGTCTACTTAA      | AAACTTAAGTAGACCTATACAGTC          |
| off-4_R        | pX330S-6        | CACCGGCCGAAACTCAATTTCCCC      | AAACGGGGAAATTGAGTTTCGGCC          |

## Supplementary Table S3. Primers used for genomic cleavage assays.

| Target locus   | Forward primer (5'→3')            | Reverse primer (5'→3')            |
|----------------|-----------------------------------|-----------------------------------|
| <i>HPRT1_A</i> | TCCTGTAATGCTCTCATTGAAACAGC        | GCTGCTGATGTTTGAAATTAACACAAG       |
| <i>HPRT1_B</i> | TTTCTGTAGGACTGAACGTCTTGCTC        | ATCTCACTGTAACCAAGTGAAATGAAAGC     |
| <i>ATM</i>     | GCGCCTGATTCGAGATCCTGAAAC          | AAATGCCAAATTCATATGCAAGGCATAATG    |
| <i>APC</i>     | CTCGATGCTGTTCCCAGGTACTGTTG        | GCCCAGTGGCCAGAAGTACGAG            |
| <i>CDH1</i>    | GCACCTGTGAGCTTGCAGGAAAGTCAG       | TCCGCTCCTCAGGACCCGAACTTTC         |
| <i>AXIN2</i>   | CCAACCCATCTTCGTTCCGCCTGG          | TGAGAGAGACAGAGAGACCACGCCG         |
| <i>CFTR</i>    | GGGAGAAGTGGAGCCTTCAGAG            | TGAAGGGTTCATATGCATAATCAAAAAG      |
| off-5          | CGAGAAGTACCTAAAATAAAGCACCTACTGCTG | TTCATTTGATTCTTTAGGCTGCTCTGATTC    |
| off-8          | GGAACCTCTTACTGTTTTTCACGAAATGATTC  | GTTGCTGCCCTCTGTCTGGTATG           |
| off-4          | TGAAGGTCAAACAGCCACCACTTCTC        | GAACCTGAGGACTTAGTTGAAGCAGTACTAGGG |

## Supplementary Table S4. Primers used for detecting chromosomal deletions.

| Target locus | Forward primer (5'→3')            | Reverse primer (5'→3')            |
|--------------|-----------------------------------|-----------------------------------|
| <i>HPRT1</i> | TCCTGTAATGCTCTCATTGAAACAGC        | ATCTCACTGTAACCAAGTGAAATGAAAGC     |
| <i>APC</i>   | CGAGAAGTACCTAAAATAAAGCACCTACTGCTG | GAACCTGAGGACTTAGTTGAAGCAGTACTAGGG |
